# Supplementary material
Source: publisher site journal article supplement (https://www.spandidos-publications.com/143/downloadSupplementary)
Supplement: Supplementary file 1 [file downloadSupplementary]

Table SI. Detailed information of the top 10 Gene Ontology analysis of the target genes of differentially expressed microRNAs between the cleft lip with or without cleft palate and control groups.

| Description                                                          | Term type          | Corrected P-value |
|----------------------------------------------------------------------|--------------------|-------------------|
| Response to oxygen-containing compound                               | Biological process | 0.30179           |
| Organelle part                                                       | Cellular component | 0.30179           |
| Positive regulation of release of cytochrome c from the mitochondria | Biological process | 0.30179           |
| Regulation of release of cytochrome c from the mitochondria          | Biological process | 0.36303           |
| Secretion by cell                                                    | Biological process | 0.39411           |
| Intracellular organelle part                                         | Cellular component | 0.39411           |
| Negative regulation of cellular process                              | Biological process | 0.59265           |
| Microtubule bundle                                                   | Cellular component | 0.59265           |
| Response to organic substance                                        | Biological process | 0.59265           |
| Release of cytochrome c from the mitochondria                        | Biological process | 0.64303           |

Table SII. Detailed information of the top 10 Gene Ontology analysis of colocalization target genes of differentially expressed long noncoding RNAs between the cleft lip with or without cleft palate and control groups.

| Description                                                        | Term type          | Corrected P-value |
|--------------------------------------------------------------------|--------------------|-------------------|
| Interleukin-1 binding                                              | Molecular function | 1                 |
| Alpha-N-acetylgalactosaminide alpha-2,6-sialyltransferase activity | Molecular function | 1                 |
| Regulation of interleukin-1-mediated signaling pathway             | Biological process | 1                 |
| Interleukin-1 receptor activity                                    | Molecular function | 1                 |
| Transmembrane signaling receptor activity                          | Molecular function | 1                 |
| Positive regulation of tyrosine phosphorylation of STAT protein    | Biological process | 1                 |
| Tricarboxylic acid metabolic process                               | Biological process | 1                 |
| Interleukin-20 receptor binding                                    | Molecular function | 1                 |
| Regulation of calcineurin-NFAT signaling cascade                   | Biological process | 1                 |
| Regulation of tyrosine phosphorylation of STAT protein             | Biological process | 1                 |
